# Supplementary material for: PKC-Mediated ZYG1 Phosphorylation Induces Fusion of Myoblasts as well as ofDictyosteliumCells
Source: Hindawi journal article supplement (doi:10.1155/2012/657423), 2012-01-01
Supplement: f1 [file 657423.f1.pdf]

## Supplemental figures and their legends

S1.

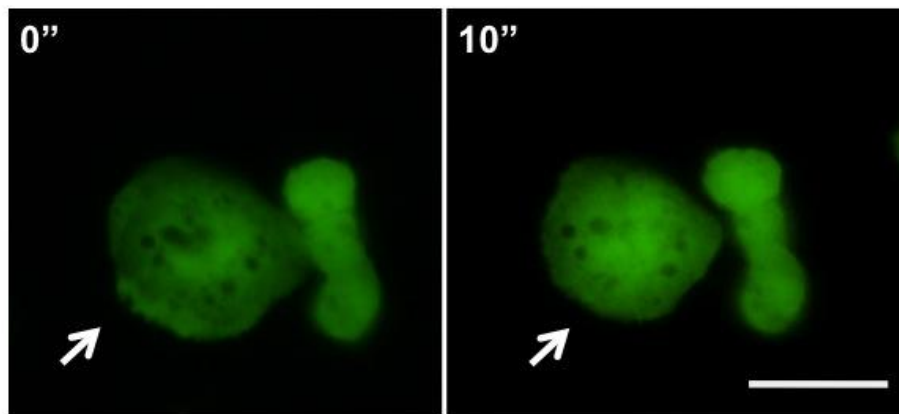

Behavior of GFP/ZYG1 protein in intact GFP/ZYG1<sup>OE</sup> cells. Starved cells were settled on coverslips which were placed in glass dishes (3.6 cm diameter) and incubated for 4 h. Cells attached on the coverslips were observed under a fluorescence microscope. GFP/ZYG1 protein observed on the cell cortex of a large cell (0") becomes non-detectable after 10 sec (10") (white arrows). Bar, 20  $\mu$ m.

S2.

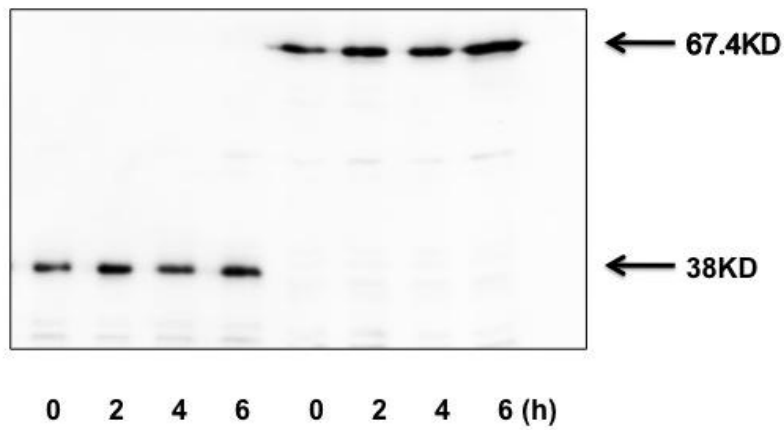

Detection of GFP protein and GFP/ZYG1 fusion protein by the anti-GFP antibody. GFP<sup>CONT</sup> and GFP/ZYG1<sup>OE</sup> cells were separately harvested at the growth phase and loading samples were prepared according to the methods as described in Materials and methods. Each sample was separated by 10 % SDS-PAGE, followed by staining with the anti-GFP antibody. The bands of GFP are detected at 38 kDa for GFP protein and 67.4 kDa for GFP/ZYG1 fusion protein, as shown by arrows. Developmental times are indicated at the bottom of the figure.

S3.

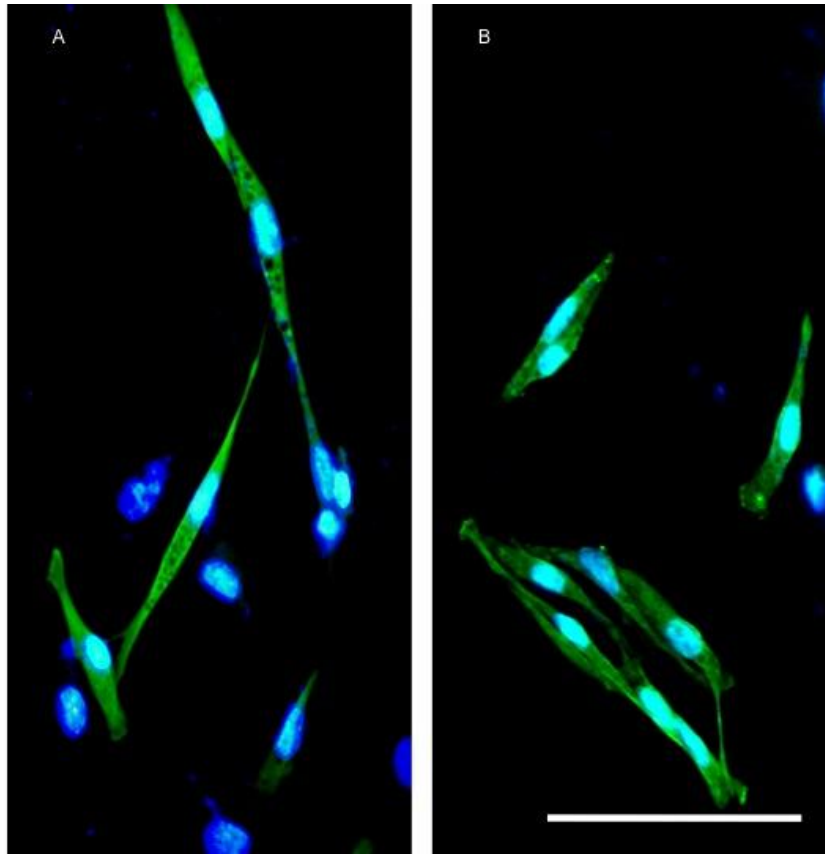

Acquisition of the fusion competence in myoblasts transfecting *ha/mzyg1* fusion gene. C2C12 cells (mouse myoblasts) were transfected with *ha/mzyg1* fusion gene, fixed with 4% paraformaldehyde and stained by the FITC-conjugated anti-HA antibody and DAPI according to the methods described in Materials and methods. The FITC images merged with DAPI images in HA/ZYG1 cells show the typical spindle-shaped cells (A), the formation of parallel alignment (B) and end-to-end alignment (A and B) as a sign of the acquisition of fusion competence. Bar, 100  $\mu$ m,

S4.

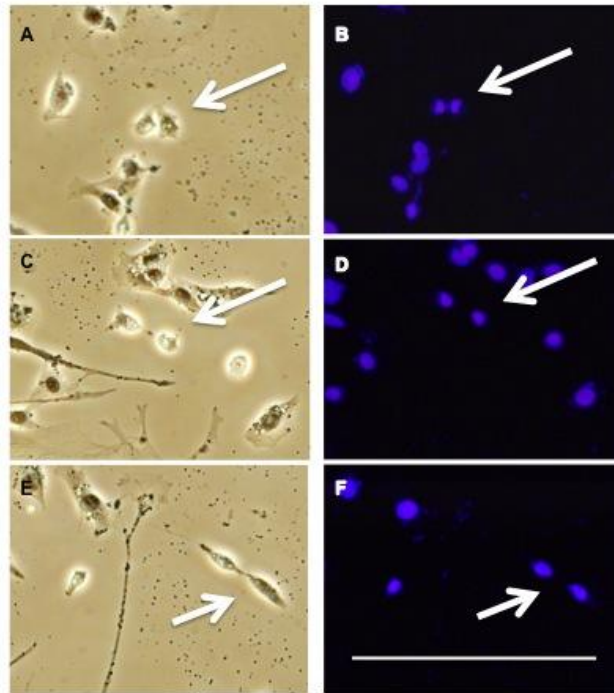

Mitotic division observed in C2C12 cells. Photographs on the right sides represent DAPI-stained images (B, D, F) in the same fields as the phase-contrast micrographs on the left side (A, C, E). Dividing cells seem to be smaller in size and have smaller nuclei (arrows). Bar, 100  $\mu$ m.

S5.

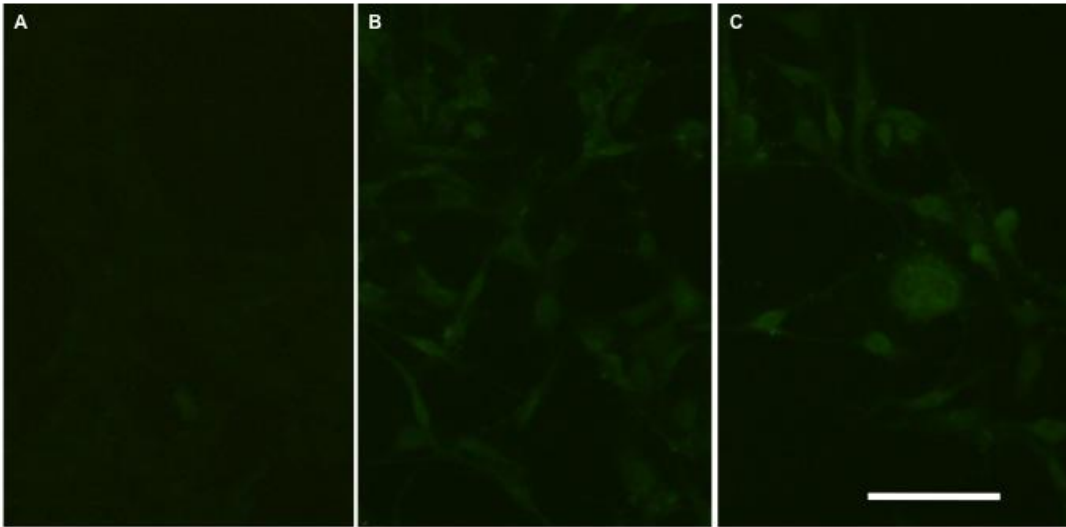

Comparison of intact C2C12 cells with those transfected with the pIRES-AcGFP vector. (A) C2C12 cells, (B) C2C12 cells transfected with the pIRES-AcGFP vector, and (C) C2C12 cells transfected with the pIRES-AcGFP vector containing *mzyg1* gene. C2C12 cells transfected with the pIRES-AcGFP vector with or without *mzyg1* gene express weak GFP fluorescence. However, it is evident that the fluorescence of GFP is distinct from that in non-treated C2C12 cells. Bar, 100  $\mu$ m.

S6.

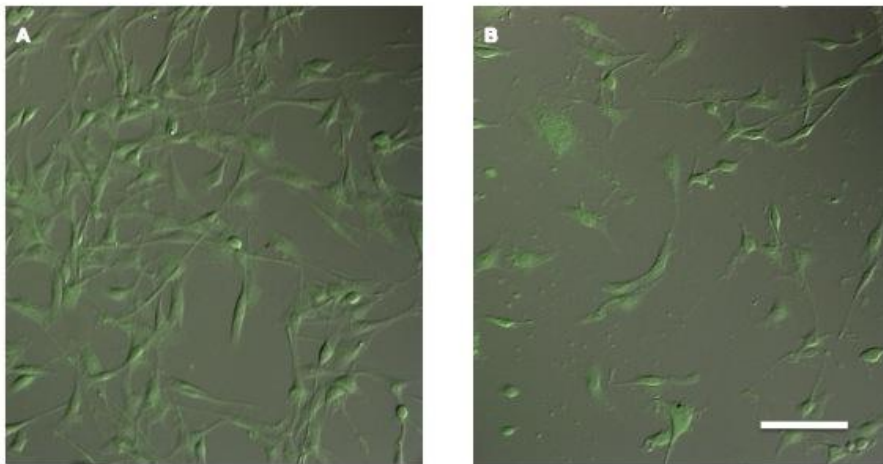

GFP images merged with DIC images in C2C12 cells transfected with the pIRES2-AcGFP vector (A) and in C2C12 cells transfected with the pIRES2-AcGFP vector containing the *mzyg1* gene (B). It is evident that GFP protein is expressed in almost all of the cells transfected with the pIRES2-AcGFP vector or pIRES2-AcGFP vector containing the *mzyg1* gene. Bar, 100 μm.
